# Supplementary material for: In vivo assessment of pharmacokinetic interactions of empagliflozin and henagliflozin with sorafenib: an animal-based study
Source: PeerJ journal article supplement (doi:10.7717/peerj.19662), 2025-07-08
Supplement: raw_data.xlsx [file raw_data.xlsx]

## Sheet: SOR-HEN control
	Sample Name	Sample ID	Sample Type	File Name	Analyte Peak Area (counts)	Analyte Peak Height (cps)	Analyte Concentration (ng/mL)	Standard Query Status	IS Peak Area (counts)	IS Peak Height (cps)	Use Record	Record Modified	Calculated Concentration (ng/mL)	Accuracy (%)
1	10		Standard	20230909\HEN.wiff	1310	618	5	N/A	90400	31800	1	0	5.09	102
2	15		Standard	20230909\HEN.wiff	1770	984	7.5	N/A	93400	30100	0	0	6.82	90.9
3	20		Quality Control	20230909\HEN.wiff	3970	1400	10	N/A	134000	42200	1	0	11	110
4	50		Standard	20230909\HEN.wiff	5800	1740	25	N/A	95200	29800	1	0	23	91.9
5	100		Standard	20230909\HEN.wiff	15300	5140	50	N/A	120000	36100	1	0	48.7	97.3
6	200		Standard	20230909\HEN.wiff	25500	7870	100	N/A	96200	34100	1	0	101	101
7	500		Standard	20230909\HEN.wiff	64400	19200	250	N/A	107000	28500	1	0	232	92.6
8	800		Quality Control	20230909\HEN.wiff	105000	32500	400	N/A	104000	30900	1	0	389	97.2
9	1000		Standard	20230909\HEN.wiff	133000	44000	500	N/A	97800	32800	1	0	523	105
10	1500		Quality Control	20230909\HEN.wiff	202000	58800	750	N/A	109000	40100	1	0	715	95.4
11	2000		Standard	20230909\HEN.wiff	344000	97700	1000	N/A	120000	35800	1	0	1100	110
12	D1-1		Unknown	20230909\DWYHEN.wiff	13900	4500	N/A	N/A	136000	39200		0	38.8	N/A
13	D1-2		Unknown	20230909\DWYHEN.wiff	85600	27700	N/A	N/A	155000	47100		0	211	N/A
14	D1-3		Unknown	20230909\DWYHEN.wiff	145000	49100	N/A	N/A	150000	42700		0	371	N/A
15	D1-4		Unknown	20230909\DWYHEN.wiff	133000	41600	N/A	N/A	142000	40200		0	361	N/A
16	D1-5		Unknown	20230909\DWYHEN.wiff	130000	39900	N/A	N/A	143000	39600		0	350	N/A
17	D1-6		Unknown	20230909\DWYHEN.wiff	328000	99300	N/A	N/A	347000	108000		0	363	N/A
18	D1-7		Unknown	20230909\DWYHEN.wiff	123000	36400	N/A	N/A	144000	43300		0	327	N/A
19	D1-8		Unknown	20230909\DWYHEN.wiff	159000	49100	N/A	N/A	159000	47900		0	383	N/A
20	D1-9		Unknown	20230909\DWYHEN.wiff	142000	44800	N/A	N/A	165000	50800		0	329	N/A
21	D1-10		Unknown	20230909\DWYHEN.wiff	109000	34000	N/A	N/A	144000	45800		0	291	N/A
22	D1-11		Unknown	20230909\DWYHEN.wiff	80800	24500	N/A	N/A	148000	41400		0	209	N/A
23	D1-12		Unknown	20230909\DWYHEN.wiff	63800	19600	N/A	N/A	156000	48900		0	157	N/A
24	D1-13		Unknown	20230909\DWYHEN.wiff	39900	12000	N/A	N/A	154000	44800		0	99.4	N/A
25	D1-14		Unknown	20230909\DWYHEN.wiff	3410	1120	N/A	N/A	145000	45200		0	8.59	N/A
26	D1-15		Unknown	20230909\DWYHEN.wiff	418	220	N/A	N/A	157000	46700		0	0.544	N/A
27	D2-1		Unknown	20230909\DWYHEN.wiff	13600	4890	N/A	N/A	146000	47800		0	35.3	N/A
28	D2-2		Unknown	20230909\DWYHEN.wiff	86000	24300	N/A	N/A	156000	49200		0	211	N/A
29	D2-3		Unknown	20230909\DWYHEN.wiff	146000	51800	N/A	N/A	151000	46000		0	372	N/A
30	D2-4		Unknown	20230909\DWYHEN.wiff	132000	39400	N/A	N/A	153000	49200		0	333	N/A
31	D2-5		Unknown	20230909\DWYHEN.wiff	120000	36900	N/A	N/A	153000	41900		0	301	N/A
32	D2-6		Unknown	20230909\DWYHEN.wiff	112000	33900	N/A	N/A	153000	50000		0	281	N/A
33	D2-7		Unknown	20230909\DWYHEN.wiff	90700	27000	N/A	N/A	155000	45900		0	225	N/A
34	D2-8		Unknown	20230909\DWYHEN.wiff	75900	23000	N/A	N/A	143000	43300		0	204	N/A
35	D2-9		Unknown	20230909\DWYHEN.wiff	79800	23900	N/A	N/A	156000	49200		0	196	N/A
36	D2-10		Unknown	20230909\DWYHEN.wiff	94200	26000	N/A	N/A	176000	57400		0	206	N/A
37	D2-11		Unknown	20230909\DWYHEN.wiff	64300	17100	N/A	N/A	172000	51000		0	143	N/A
38	D2-12		Unknown	20230909\DWYHEN.wiff	46300	13600	N/A	N/A	146000	45300		0	121	N/A
39	D2-13		Unknown	20230909\DWYHEN.wiff	32600	10800	N/A	N/A	163000	50200		0	76.6	N/A
40	D2-14		Unknown	20230909\DWYHEN.wiff	7570	2100	N/A	N/A	156000	51000		0	18.2	N/A
41	D2-15		Unknown	20230909\DWYHEN.wiff	698	592	N/A	N/A	163000	61200		0	1.17	N/A
42	D3-1		Unknown	20230910DWYHEN.wiff	27800	7700	N/A	N/A	151000	45000		0	70.3	N/A
43	D3-2		Unknown	20230910DWYHEN.wiff	92900	28300	N/A	N/A	157000	48300		0	227	N/A
44	D3-3		Unknown	20230910DWYHEN.wiff	98900	32400	N/A	N/A	150000	46200		0	252	N/A
45	D3-4		Unknown	20230910DWYHEN.wiff	93000	25500	N/A	N/A	142000	38900		0	251	N/A
46	D3-5		Unknown	20230910DWYHEN.wiff	83600	24900	N/A	N/A	143000	39600		0	224	N/A
47	D3-6		Unknown	20230910DWYHEN.wiff	93400	29200	N/A	N/A	143000	41000		0	251	N/A
48	D3-7		Unknown	20230910DWYHEN.wiff	93400	27500	N/A	N/A	152000	49000		0	235	N/A
49	D3-8		Unknown	20230910DWYHEN.wiff	72900	22300	N/A	N/A	160000	46000		0	175	N/A
50	D3-9		Unknown	20230910DWYHEN.wiff	73600	28200	N/A	N/A	144000	44800		0	196	N/A
51	D3-10		Unknown	20230910DWYHEN.wiff	64100	18500	N/A	N/A	149000	45000		0	166	N/A
52	D3-11		Unknown	20230910DWYHEN.wiff	78000	24500	N/A	N/A	153000	46100		0	196	N/A
53	D3-12		Unknown	20230910DWYHEN.wiff	57800	17200	N/A	N/A	151000	43700		0	147	N/A
54	D3-13		Unknown	20230910DWYHEN.wiff	37600	12600	N/A	N/A	149000	42200		0	96.4	N/A
55	D3-14		Unknown	20230910DWYHEN.wiff	5440	1820	N/A	N/A	144000	40900		0	14	N/A
56	D3-15		Unknown	20230910DWYHEN.wiff	2080	1010	N/A	N/A	141000	40300		0	5.19	N/A
57	D4-1		Unknown	20230910DWYHEN.wiff	12500	4010	N/A	N/A	149000	40200		0	31.8	N/A
58	D4-2		Unknown	20230910DWYHEN.wiff	67700	24000	N/A	N/A	142000	45700		0	182	N/A
59	D4-3		Unknown	20230910DWYHEN.wiff	129000	42800	N/A	N/A	151000	47200		0	327	N/A
60	D4-4		Unknown	20230910DWYHEN.wiff	134000	48500	N/A	N/A	143000	41800		0	362	N/A
61	D4-5		Unknown	20230910DWYHEN.wiff	152000	44000	N/A	N/A	146000	50700		0	400	N/A
62	D4-6		Unknown	20230910DWYHEN.wiff	109000	37800	N/A	N/A	156000	45600		0	269	N/A
63	D4-7		Unknown	20230910DWYHEN.wiff	106000	33200	N/A	N/A	156000	50100		0	260	N/A
64	D4-8		Unknown	20230910DWYHEN.wiff	118000	34000	N/A	N/A	146000	49400		0	310	N/A
65	D4-9		Unknown	20230910DWYHEN.wiff	108000	33100	N/A	N/A	157000	46900		0	264	N/A
66	D4-10		Unknown	20230910DWYHEN.wiff	89600	25000	N/A	N/A	161000	49800		0	214	N/A
67	D4-11		Unknown	20230910DWYHEN.wiff	53100	18300	N/A	N/A	142000	38800		0	144	N/A
68	D4-12		Unknown	20230910DWYHEN.wiff	36700	12100	N/A	N/A	147000	43500		0	95.8	N/A
69	D4-13		Unknown	20230910DWYHEN.wiff	24800	8480	N/A	N/A	140000	41800		0	67.7	N/A
70	D4-14		Unknown	20230910DWYHEN.wiff	3810	1090	N/A	N/A	139000	41100		0	10.1	N/A
71	D4-15		Unknown	20230910DWYHEN.wiff	638	473	N/A	N/A	154000	51300		0	1.12	N/A
72	D5-1		Unknown	20230910DWYHEN.wiff	34800	10400	N/A	N/A	153000	46200		0	87.1	N/A
73	D5-2		Unknown	20230910DWYHEN.wiff	110000	35400	N/A	N/A	156000	47200		0	271	N/A
74	D5-3		Unknown	20230910DWYHEN.wiff	126000	35000	N/A	N/A	161000	52200		0	301	N/A
75	D5-4		Unknown	20230910DWYHEN.wiff	127000	37700	N/A	N/A	125000	43000		0	389	N/A
76	D5-5		Unknown	20230910DWYHEN.wiff	96600	27800	N/A	N/A	122000	40000		0	304	N/A
77	D5-6		Unknown	20230910DWYHEN.wiff	83800	27200	N/A	N/A	125000	37300		0	258	N/A
78	D5-7		Unknown	20230910DWYHEN.wiff	80700	22400	N/A	N/A	129000	36800		0	240	N/A
79	D5-8		Unknown	20230910DWYHEN.wiff	74400	23000	N/A	N/A	114000	35100		0	249	N/A
80	D5-9		Unknown	20230910DWYHEN.wiff	76400	20800	N/A	N/A	125000	41100		0	234	N/A
81	D5-10		Unknown	20230910DWYHEN.wiff	80500	27200	N/A	N/A	121000	35900		0	256	N/A
82	D5-11		Unknown	20230910DWYHEN.wiff	60400	19600	N/A	N/A	126000	35200		0	184	N/A
83	D5-12		Unknown	20230910DWYHEN.wiff	41200	11700	N/A	N/A	123000	43900		0	128	N/A
84	D5-13		Unknown	20230910DWYHEN.wiff	28900	8350	N/A	N/A	116000	31900		0	95.6	N/A
85	D5-14		Unknown	20230910DWYHEN.wiff	2700	1330	N/A	N/A	125000	38700		0	7.87	N/A
86	D5-15		Unknown	20230910DWYHEN.wiff	671	837	N/A	N/A	119000	34400		0	1.69	N/A
87	D6-1		Unknown	20230910DWYHEN.wiff	22200	6270	N/A	N/A	123000	41100		0	69.2	N/A
88	D6-2		Unknown	20230910DWYHEN.wiff	83600	23800	N/A	N/A	137000	44200		0	234	N/A
89	D6-3		Unknown	20230910DWYHEN.wiff	106000	31600	N/A	N/A	116000	34200		0	350	N/A
90	D6-4		Unknown	20230910DWYHEN.wiff	101000	30900	N/A	N/A	125000	39200		0	311	N/A
91	D6-5		Unknown	20230910DWYHEN.wiff	93300	33700	N/A	N/A	133000	40000		0	268	N/A
92	D6-6		Unknown	20230910DWYHEN.wiff	56400	17000	N/A	N/A	129000	43100		0	168	N/A
93	D6-7		Unknown	20230910DWYHEN.wiff	74200	22600	N/A	N/A	125000	39900		0	228	N/A
94	D6-8		Unknown	20230910DWYHEN.wiff	75600	20100	N/A	N/A	124000	35500		0	234	N/A
95	D6-9		Unknown	20230910DWYHEN.wiff	73900	28500	N/A	N/A	141000	56700		0	201	N/A
96	D6-10		Unknown	20230910DWYHEN.wiff	70400	20600	N/A	N/A	129000	36500		0	210	N/A
97	D6-11		Unknown	20230910DWYHEN.wiff	44000	12700	N/A	N/A	134000	39700		0	125	N/A
98	D6-12		Unknown	20230910DWYHEN.wiff	30700	9580	N/A	N/A	134000	40600		0	87.7	N/A
99	D6-13		Unknown	20230910DWYHEN.wiff	48600	16500	N/A	N/A	143000	39500		0	130	N/A
100	D6-14		Unknown	20230910DWYHEN.wiff	3800	1130	N/A	N/A	134000	42300		0	10.5	N/A
101	D6-15		Unknown	20230910DWYHEN.wiff	935	581	N/A	N/A	136000	40800		0	2.17	N/A

## Sheet: SOR-HEN experiment
	Sample Name	Sample ID	Sample Type	File Name	Analyte Peak Area (counts)	Analyte Peak Height (cps)	Analyte Concentration (ng/mL)	Standard Query Status	IS Peak Area (counts)	IS Peak Height (cps)	Use Record	Record Modified	Calculated Concentration (ng/mL)	Accuracy (%)
1	2		Standard	20231018\HEN.wiff	5420	1560	2	N/A	213000	48100	0	0	15.2	761
2	5		Standard	20231018\HEN.wiff	3740	1060	5	N/A	200000	46700	0	0	11.5	230
3	10		Standard	20231018\HEN.wiff	3350	789	10	N/A	214000	47900	1	0	9.81	98.1
4	15		Quality Control	20231018\HEN.wiff	4850	1080	15	N/A	213000	53800	1	0	13.8	91.8
5	20		Standard	20231018\HEN.wiff	7610	2520	20	N/A	208000	47300	1	1	21.3	107
6	50		Standard	20231018\HEN.wiff	18100	4870	50	N/A	211000	45500	1	0	48.4	96.9
7	100		Standard	20231018\HEN.wiff	36600	8700	100	N/A	217000	47200	1	0	93.7	93.7
8	200		Standard	20231018\HEN.wiff	74900	18100	200	N/A	216000	57000	1	0	192	96.1
9	500		Standard	20231018\HEN.wiff	177000	43200	500	N/A	201000	48100	1	0	487	97.5
10	800		Quality Control	20231018\HEN.wiff	302000	72300	800	N/A	216000	52600	1	0	768	96
11	1000		Standard	20231018\HEN.wiff	393000	106000	1000	N/A	211000	51200	1	0	1030	103
12	1500		Quality Control	20231018\HEN.wiff	613000	143000	1500	N/A	214000	52500	1	0	1580	105
13	2000		Standard	20231018\HEN.wiff	696000	178000	2000	N/A	177000	44400	1	0	2170	108
14	C1-1		Unknown	20231018\HEN.wiff	3310	1010	N/A	N/A	182000	43200		0	26.4	N/A
15	C1-2		Unknown	20231018\HEN.wiff	20100	5050	N/A	N/A	219000	55200		0	76.2	N/A
16	C1-3		Unknown	20231018\HEN.wiff	50800	12400	N/A	N/A	213000	58200		0	153	N/A
17	C1-4		Unknown	20231018\HEN.wiff	49600	12000	N/A	N/A	223000	53400		0	183	N/A
18	C1-5		Unknown	20231018\HEN.wiff	52000	12200	N/A	N/A	223000	55100		0	188	N/A
19	C1-6		Unknown	20231018\HEN.wiff	47600	12800	N/A	N/A	229000	57600		0	188	N/A
20	C1-7		Unknown	20231018\HEN.wiff	53000	15000	N/A	N/A	217000	54600		0	250	N/A
21	C1-8		Unknown	20231018\HEN.wiff	46200	11600	N/A	N/A	230000	54000		0	186	N/A
22	C1-9		Unknown	20231018\HEN.wiff	43400	10100	N/A	N/A	237000	56300		0	153	N/A
23	C1-10		Unknown	20231018\HEN.wiff	38200	9810	N/A	N/A	228000	56100		0	109	N/A
24	C1-11		Unknown	20231018\HEN.wiff	21600	5740	N/A	N/A	223000	57400		0	55.4	N/A
25	C1-12		Unknown	20231018\HEN.wiff	14000	3570	N/A	N/A	226000	54300		0	32.3	N/A
26	C1-13		Unknown	20231018\HEN.wiff	10100	2520	N/A	N/A	206000	54400		0	20.6	N/A
27	C1-14		Unknown	20231018\HEN.wiff	2900	747	N/A	N/A	224000	54000		0	1.54	N/A
28	C1-15		Unknown	20231018\HEN.wiff	68.5	103	N/A	N/A	96800	21600		0	< 0	N/A
29	C2-1		Unknown	20231018\HEN.wiff	2870	780	N/A	N/A	235000	55300		0	7.96	N/A
30	C2-2		Unknown	20231018\HEN.wiff	14000	3530	N/A	N/A	231000	55200		0	34.7	N/A
31	C2-3		Unknown	20231018\HEN.wiff	43400	12200	N/A	N/A	226000	57800		0	107	N/A
32	C2-4		Unknown	20231018\HEN.wiff	57800	14800	N/A	N/A	240000	62700		0	134	N/A
33	C2-5		Unknown	20231018\HEN.wiff	68500	16700	N/A	N/A	242000	61100		0	157	N/A
34	C2-6		Unknown	20231018\HEN.wiff	84800	22600	N/A	N/A	231000	64400		0	203	N/A
35	C2-7		Unknown	20231018\HEN.wiff	87400	26100	N/A	N/A	238000	58700		0	203	N/A
36	C2-8		Unknown	20231018\HEN.wiff	76800	18500	N/A	N/A	247000	63600		0	173	N/A
37	C2-9		Unknown	20231018\HEN.wiff	69800	18400	N/A	N/A	223000	55800		0	174	N/A
38	C2-10		Unknown	20231018\HEN.wiff	58400	14100	N/A	N/A	204000	52600		0	159	N/A
39	C2-11		Unknown	20231018\HEN.wiff	51000	13100	N/A	N/A	232000	62100		0	122	N/A
40	C2-12		Unknown	20231018\HEN.wiff	36400	10100	N/A	N/A	226000	55100		0	90	N/A
41	C2-13		Unknown	20231018\HEN.wiff	23500	5760	N/A	N/A	250000	64500		0	53	N/A
42	C2-14		Unknown	20231018\HEN.wiff	2190	662	N/A	N/A	229000	59700		0	6.47	N/A
43	C2-15		Unknown	20231018\HEN.wiff	1720	585	N/A	N/A	233000	59000		0	5.27	N/A
44	C3-1		Unknown	20231018\HEN.wiff	5460	1440	N/A	N/A	215000	54900		0	15.2	N/A
45	C3-2		Unknown	20231018\HEN.wiff	18100	4430	N/A	N/A	231000	58300		0	44.4	N/A
46	C3-3		Unknown	20231018\HEN.wiff	72500	19300	N/A	N/A	242000	58000		0	166	N/A
47	C3-4		Unknown	20231018\HEN.wiff	67800	17500	N/A	N/A	236000	61400		0	160	N/A
48	C3-5		Unknown	20231018\HEN.wiff	79700	19000	N/A	N/A	241000	56300		0	183	N/A
49	C3-6		Unknown	20231018\HEN.wiff	78600	18200	N/A	N/A	229000	58600		0	190	N/A
50	C3-7		Unknown	20231018\HEN.wiff	79100	20300	N/A	N/A	247000	62900		0	178	N/A
51	C3-8		Unknown	20231018\HEN.wiff	74200	18600	N/A	N/A	247000	59300		0	166	N/A
52	C3-9		Unknown	20231018\HEN.wiff	80300	24900	N/A	N/A	229000	59900		0	194	N/A
53	C3-10		Unknown	20231018\HEN.wiff	78100	19300	N/A	N/A	234000	56200		0	185	N/A
54	C3-11		Unknown	20231018\HEN.wiff	55400	15300	N/A	N/A	229000	54800		0	134	N/A
55	C3-12		Unknown	20231018\HEN.wiff	29000	6800	N/A	N/A	213000	49900		0	76.3	N/A
56	C3-13		Unknown	20231018\HEN.wiff	19900	5000	N/A	N/A	235000	55300		0	47.7	N/A
57	C3-14		Unknown	20231018\HEN.wiff	1980	620	N/A	N/A	234000	57200		0	5.86	N/A
58	C3-15		Unknown	20231018\HEN.wiff	45.7	87.5	N/A	N/A	275000	69300		0	1.3	N/A
59	C4-1		Unknown	20231018\HEN.wiff	1140	403	N/A	N/A	79000	17200		0	9.16	N/A
60	C4-2		Unknown	20231018\HEN.wiff	17400	4690	N/A	N/A	235000	66400		0	42	N/A
61	C4-3		Unknown	20231018\HEN.wiff	89200	27300	N/A	N/A	267000	65800		0	185	N/A
62	C4-4		Unknown	20231018\HEN.wiff	50400	13500	N/A	N/A	209000	54200		0	134	N/A
63	C4-5		Unknown	20231018\HEN.wiff	48600	12200	N/A	N/A	237000	57900		0	114	N/A
64	C4-6		Unknown	20231018\HEN.wiff	67700	16500	N/A	N/A	243000	61000		0	155	N/A
65	C4-7		Unknown	20231018\HEN.wiff	94600	24300	N/A	N/A	243000	62100		0	215	N/A
66	C4-8		Unknown	20231018\HEN.wiff	100000	26500	N/A	N/A	280000	72100		0	198	N/A
67	C4-9		Unknown	20231018\HEN.wiff	89600	23200	N/A	N/A	222000	55600		0	223	N/A
68	C4-10		Unknown	20231018\HEN.wiff	24400	5340	N/A	N/A	83200	18900		0	163	N/A
69	C4-11		Unknown	20231018\HEN.wiff	64800	16600	N/A	N/A	234000	60700		0	154	N/A
70	C4-12		Unknown	20231018\HEN.wiff	50500	12400	N/A	N/A	234000	60000		0	120	N/A
71	C4-13		Unknown	20231018\HEN.wiff	38800	9860	N/A	N/A	269000	67400		0	80.4	N/A
72	C4-14		Unknown	20231018\HEN.wiff	2800	746	N/A	N/A	198000	47500		0	8.99	N/A
73	C4-15		Unknown	20231018\HEN.wiff	517	161	N/A	N/A	237000	61900		0	2.41	N/A
74	C5-1		Unknown	20231018\HEN.wiff	8160	2140	N/A	N/A	229000	62600		0	20.8	N/A
75	C5-2		Unknown	20231018\HEN.wiff	29000	7530	N/A	N/A	282000	76400		0	57.8	N/A
76	C5-3		Unknown	20231018\HEN.wiff	77500	18700	N/A	N/A	270000	62300		0	159	N/A
77	C5-4		Unknown	20231018\HEN.wiff	66300	18800	N/A	N/A	267000	71200		0	138	N/A
78	C5-5		Unknown	20231018\HEN.wiff	65300	16400	N/A	N/A	265000	62900		0	137	N/A
79	C5-6		Unknown	20231018\HEN.wiff	60500	13800	N/A	N/A	233000	58700		0	144	N/A
80	C5-7		Unknown	20231018\HEN.wiff	67700	17300	N/A	N/A	267000	68700		0	141	N/A
81	C5-8		Unknown	20231018\HEN.wiff	68500	19400	N/A	N/A	254000	62400		0	150	N/A
82	C5-9		Unknown	20231018\HEN.wiff	20000	4310	N/A	N/A	94700	20200		0	117	N/A
83	C5-10		Unknown	20231018\HEN.wiff	58100	15200	N/A	N/A	264000	72000		0	122	N/A
84	C5-11		Unknown	20231018\HEN.wiff	28900	8400	N/A	N/A	250000	67900		0	64.8	N/A
85	C5-12		Unknown	20231018\HEN.wiff	31300	8220	N/A	N/A	258000	59700		0	68.1	N/A
86	C5-13		Unknown	20231018\HEN.wiff	8350	1930	N/A	N/A	98800	22600		0	47.7	N/A
87	C5-14		Unknown	20231018\HEN.wiff	1570	462	N/A	N/A	248000	65200		0	4.68	N/A
88	C5-15		Unknown	20231018\HEN.wiff	68.4	80	N/A	N/A	93100	20600		0	1.62	N/A
89	C6-1		Unknown	20231018\HEN.wiff	4530	1700	N/A	N/A	268000	69400		0	10.5	N/A
90	C6-2		Unknown	20231018\HEN.wiff	3910	1140	N/A	N/A	78800	16700		0	28.5	N/A
91	C6-3		Unknown	20231018\HEN.wiff	9470	1880	N/A	N/A	78200	16300		0	67.8	N/A
92	C6-4		Unknown	20231018\HEN.wiff	44300	12400	N/A	N/A	271000	72400		0	91.1	N/A
93	C6-5		Unknown	20231018\HEN.wiff	49200	12800	N/A	N/A	246000	70000		0	111	N/A
94	C6-6		Unknown	20231018\HEN.wiff	62600	18700	N/A	N/A	243000	64500		0	143	N/A
95	C6-7		Unknown	20231018\HEN.wiff	61800	15700	N/A	N/A	223000	56000		0	154	N/A
96	C6-8		Unknown	20231018\HEN.wiff	63700	18600	N/A	N/A	255000	64700		0	139	N/A
97	C6-9		Unknown	20231018\HEN.wiff	40900	11500	N/A	N/A	254000	64400		0	89.7	N/A
98	C6-10		Unknown	20231018\HEN.wiff	58500	15500	N/A	N/A	226000	61900		0	144	N/A
99	C6-11		Unknown	20231018\HEN.wiff	45600	15600	N/A	N/A	227000	60300		0	112	N/A
100	C6-12		Unknown	20231018\HEN.wiff	22800	5660	N/A	N/A	231000	59100		0	55.4	N/A
101	C6-13		Unknown	20231018\HEN.wiff	22600	5860	N/A	N/A	229000	56500		0	55.6	N/A
102	C6-14		Unknown	20231018\HEN.wiff	2310	864	N/A	N/A	261000	67600		0	6.09	N/A
103	C6-15		Unknown	20231018\HEN.wiff	2320	851	N/A	N/A	218000	53300		0	7.07	N/A

## Sheet: SUO-EMPA-control
	Sample Name	Sample ID	Sample Type	File Name	Analyte Peak Area (counts)	Analyte Peak Height (cps)	Analyte Concentration (ng/mL)	Standard Query Status	IS Peak Area (counts)	IS Peak Height (cps)	Use Record	Record Modified	Calculated Concentration (ng/mL)	Accuracy (%)
1	1		Standard	20240104\EMPA.wiff	741	191	5	N/A	124000	27400	1	0	4.81	96.2
2	2		Standard	20240104\EMPA.wiff	1900	485	10	N/A	127000	32500	1	0	10.7	107
3	3		Standard	20240104\EMPA.wiff	9870	2660	50	N/A	127000	29300	1	0	51.7	103
4	4		Standard	20240104\EMPA.wiff	37300	8300	200	N/A	126000	32800	1	0	194	97.1
5	5		Standard	20240104\EMPA.wiff	92600	22000	500	N/A	128000	28600	1	0	473	94.7
6	6		Standard	20240104\EMPA.wiff	176000	41100	1000	N/A	104000	21300	1	0	1100	110
7	7		Standard	20240104\EMPA.wiff	347000	95200	2000	N/A	123000	33000	1	0	1840	91.8
8	L		Quality Control	20240104\EMPA.wiff	2200	699	15	N/A	99100	23500	1	0	15.4	102
9	M		Quality Control	20240104\EMPA.wiff	139000	35000	800	N/A	122000	30900	1	0	741	92.7
10	H		Quality Control	20240104\EMPA.wiff	248000	57500	1500	N/A	120000	31100	1	0	1350	90
11	C1-1		Unknown	20240104\EMPA.wiff	2150	688	N/A	N/A	24700	5280		0	57.6	N/A
12	C1-2		Unknown	20240104\EMPA.wiff	12900	2890	N/A	N/A	78000	16900		0	109	N/A
13	C1-3		Unknown	20240104\EMPA.wiff	6040	1550	N/A	N/A	23200	5260		0	170	N/A
14	C1-4		Unknown	20240104\EMPA.wiff	20600	4720	N/A	N/A	89600	19900		0	151	N/A
15	C1-5		Unknown	20240104\EMPA.wiff	17000	4160	N/A	N/A	82100	21200		0	136	N/A
16	C1-6		Unknown	20240104\EMPA.wiff	12300	3300	N/A	N/A	78800	17800		0	103	N/A
17	C1-7		Unknown	20240104\EMPA.wiff	4490	950	N/A	N/A	25000	4860		0	118	N/A
18	C1-8		Unknown	20240104\EMPA.wiff	5980	1430	N/A	N/A	75200	16700		0	52.8	N/A
19	C1-9		Unknown	20240104\EMPA.wiff	3080	988	N/A	N/A	72900	15700		0	28.5	N/A
20	C1-10		Unknown	20240104\EMPA.wiff	1690	475	N/A	N/A	80800	20500		0	14.5	N/A
21	C1-11		Unknown	20240104\EMPA.wiff	851	259	N/A	N/A	68400	15600		0	9.03	N/A
22	C1-12		Unknown	20240104\EMPA.wiff	1260	534	N/A	N/A	70100	15500		1	12.6	N/A
23	C1-13		Unknown	20240104\EMPA.wiff	146	94.8	N/A	N/A	34000	8120		0	3.72	N/A
26	C2-1		Unknown	20240104\EMPA.wiff	4650	1210	N/A	N/A	87000	18300		0	35.8	N/A
27	C2-2		Unknown	20240104\EMPA.wiff	12100	2690	N/A	N/A	84400	18400		0	94.3	N/A
28	C2-3		Unknown	20240104\EMPA.wiff	26200	6640	N/A	N/A	88400	18100		0	194	N/A
29	C2-4		Unknown	20240104\EMPA.wiff	21500	5420	N/A	N/A	89200	17000		0	158	N/A
30	C2-5		Unknown	20240104\EMPA.wiff	18700	4870	N/A	N/A	89400	17500		0	137	N/A
31	C2-6		Unknown	20240104\EMPA.wiff	13100	3040	N/A	N/A	88700	17000		0	97.4	N/A
32	C2-7		Unknown	20240104\EMPA.wiff	10600	2460	N/A	N/A	86500	17700		0	81	N/A
33	C2-8		Unknown	20240104\EMPA.wiff	5880	1320	N/A	N/A	78400	16900		0	49.8	N/A
34	C2-9		Unknown	20240104\EMPA.wiff	6040	1560	N/A	N/A	76100	19200		0	52.7	N/A
35	C2-10		Unknown	20240104\EMPA.wiff	1830	574	N/A	N/A	69700	15500		0	18	N/A
36	C2-11		Unknown	20240104\EMPA.wiff	1350	408	N/A	N/A	67500	15400		0	14	N/A
37	C2-12		Unknown	20240104\EMPA.wiff	1600	427	N/A	N/A	74700	16800		0	14.9	N/A
38	C2-13		Unknown	20240104\EMPA.wiff	2600	724	N/A	N/A	82800	18200		0	21.4	N/A
39	C2-14		Unknown	20240104\EMPA.wiff	380	162	N/A	N/A	82000	19000		0	3.94	N/A
40	C2-15		Unknown	20240104\EMPA.wiff	1330	400	N/A	N/A	82900	17800		0	11.4	N/A
41	C3-1		Unknown	20240104\EMPA.wiff	6940	1820	N/A	N/A	91200	18000		0	50.6	N/A
42	C3-2		Unknown	20240104\EMPA.wiff	10600	2600	N/A	N/A	99300	20300		0	70.4	N/A
43	C3-3		Unknown	20240104\EMPA.wiff	18200	4070	N/A	N/A	94800	18700		0	126	N/A
44	C3-4		Unknown	20240104\EMPA.wiff	27000	7250	N/A	N/A	108000	22500		0	163	N/A
45	C3-5		Unknown	20240104\EMPA.wiff	25800	6810	N/A	N/A	107000	21600		0	158	N/A
46	C3-6		Unknown	20240104\EMPA.wiff	17900	4820	N/A	N/A	89700	18800		0	131	N/A
47	C3-7		Unknown	20240104\EMPA.wiff	12700	3550	N/A	N/A	70800	14300		0	118	N/A
48	C3-8		Unknown	20240104\EMPA.wiff	11800	4610	N/A	N/A	81900	17100		1	95	N/A
49	C3-9		Unknown	20240104\EMPA.wiff	3420	974	N/A	N/A	76500	16800		0	30.1	N/A
50	C3-10		Unknown	20240104\EMPA.wiff	1950	464	N/A	N/A	66500	17600		0	20.1	N/A
51	C3-11		Unknown	20240104\EMPA.wiff	1320	323	N/A	N/A	79900	19100		0	11.7	N/A
52	C3-12		Unknown	20240104\EMPA.wiff	867	238	N/A	N/A	82200	20700		0	7.79	N/A
53	C3-13		Unknown	20240104\EMPA.wiff	1120	331	N/A	N/A	72800	16700		0	10.9	N/A
54	C4-1		Unknown	20240104\EMPA.wiff	1480	377	N/A	N/A	46500	9240		0	21.7	N/A
55	C4-2		Unknown	20240104\EMPA.wiff	3710	1180	N/A	N/A	42800	9100		1	57.5	N/A
56	C4-3		Unknown	20240104\EMPA.wiff	8970	2210	N/A	N/A	53600	12200		0	110	N/A
57	C4-4		Unknown	20240104\EMPA.wiff	9980	2500	N/A	N/A	47000	10400		0	139	N/A
58	C4-5		Unknown	20240104\EMPA.wiff	19600	4730	N/A	N/A	73500	15900		0	175	N/A
59	C4-6		Unknown	20240104\EMPA.wiff	8340	2070	N/A	N/A	53900	11600		0	102	N/A
60	C4-7		Unknown	20240104\EMPA.wiff	10900	2790	N/A	N/A	79000	18100		0	90.8	N/A
61	C4-8		Unknown	20240104\EMPA.wiff	7230	1730	N/A	N/A	79000	18500		0	60.6	N/A
62	C4-9		Unknown	20240104\EMPA.wiff	5970	1680	N/A	N/A	81900	20900		0	48.5	N/A
63	C4-10		Unknown	20240104\EMPA.wiff	1440	378	N/A	N/A	73200	16100		0	13.8	N/A
64	C4-11		Unknown	20240104\EMPA.wiff	1610	400	N/A	N/A	70600	15600		0	15.8	N/A
65	C4-12		Unknown	20240104\EMPA.wiff	1330	303	N/A	N/A	81600	18200		0	11.6	N/A
66	C4-13		Unknown	20240104\EMPA.wiff	703	261	N/A	N/A	33800	8230		0	14.5	N/A
69	C5-1		Unknown	20240104\EMPA.wiff	18400	4620	N/A	N/A	82700	20300		0	146	N/A
70	C5-2		Unknown	20240104\EMPA.wiff	21300	5430	N/A	N/A	75500	18200		0	185	N/A
71	C5-3		Unknown	20240104\EMPA.wiff	16900	4820	N/A	N/A	79600	17700		0	139	N/A
72	C5-4		Unknown	20240104\EMPA.wiff	13900	3720	N/A	N/A	69700	17500		0	131	N/A
73	C5-5		Unknown	20240104\EMPA.wiff	13000	3350	N/A	N/A	78600	18500		0	109	N/A
74	C5-6		Unknown	20240104\EMPA.wiff	9370	2590	N/A	N/A	80900	18800		0	76.4	N/A
75	C5-7		Unknown	20240104\EMPA.wiff	4290	1050	N/A	N/A	36600	9360		0	77.3	N/A
76	C5-8		Unknown	20240104\EMPA.wiff	1060	367	N/A	N/A	41900	10300		0	17.4	N/A
77	C5-9		Unknown	20240104\EMPA.wiff	2230	823	N/A	N/A	33900	8500		0	43.8	N/A
78	C5-10		Unknown	20240104\EMPA.wiff	1540	457	N/A	N/A	47900	10600		0	21.9	N/A
79	C5-11		Unknown	20240104\EMPA.wiff	1320	346	N/A	N/A	68900	19000		0	13.4	N/A
80	C5-12		Unknown	20240104\EMPA.wiff	1200	359	N/A	N/A	79200	20800		0	10.8	N/A
81	C5-13		Unknown	20240104\EMPA.wiff	1020	332	N/A	N/A	74600	18200		0	9.86	N/A
84	C6-1		Unknown	20240104\EMPA.wiff	12300	2940	N/A	N/A	84600	18500		0	95.5	N/A
85	C6-2		Unknown	20240104\EMPA.wiff	17300	4020	N/A	N/A	76900	19500		0	148	N/A
86	C6-3		Unknown	20240104\EMPA.wiff	15900	4380	N/A	N/A	80100	17200		0	131	N/A
87	C6-4		Unknown	20240104\EMPA.wiff	7150	1990	N/A	N/A	34000	9150		0	138	N/A
88	C6-5		Unknown	20240104\EMPA.wiff	3390	728	N/A	N/A	20100	5140		0	111	N/A
89	C6-6		Unknown	20240104\EMPA.wiff	3860	1010	N/A	N/A	36600	8300		0	69.7	N/A
90	C6-7		Unknown	20240104\EMPA.wiff	3200	747	N/A	N/A	38700	8410		0	54.9	N/A
91	C6-8		Unknown	20240104\EMPA.wiff	1420	368	N/A	N/A	41400	10500		0	23.2	N/A
92	C6-9		Unknown	20240104\EMPA.wiff	1690	584	N/A	N/A	65500	16400		0	17.7	N/A
93	C6-10		Unknown	20240104\EMPA.wiff	840	254	N/A	N/A	63300	16800		0	9.57	N/A
94	C6-11		Unknown	20240104\EMPA.wiff	985	246	N/A	N/A	72500	17700		0	9.78	N/A
95	C6-12		Unknown	20240104\EMPA.wiff	3060	757	N/A	N/A	69000	18200		0	29.9	N/A
96	C6-13		Unknown	20240104\EMPA.wiff	639	190	N/A	N/A	85900	17400		0	5.76	N/A

## Sheet: SUO-EMPA-experiment
	Sample Name	Sample ID	Sample Type	File Name	Analyte Peak Area (counts)	Analyte Peak Height (cps)	Analyte Concentration (ng/mL)	Standard Query Status	IS Peak Area (counts)	IS Peak Height (cps)	Use Record	Record Modified	Calculated Concentration (ng/mL)	Accuracy (%)
1	1		Standard	20240104\EMPA.wiff	741	191	5	N/A	124000	27400	1	0	4.81	96.2
2	2		Standard	20240104\EMPA.wiff	1900	485	10	N/A	127000	32500	1	0	10.7	107
3	3		Standard	20240104\EMPA.wiff	9870	2660	50	N/A	127000	29300	1	0	51.7	103
4	4		Standard	20240104\EMPA.wiff	37300	8300	200	N/A	126000	32800	1	0	194	97.1
5	5		Standard	20240104\EMPA.wiff	92600	22000	500	N/A	128000	28600	1	0	473	94.7
6	6		Standard	20240104\EMPA.wiff	176000	41100	1000	N/A	104000	21300	1	0	1100	110
7	7		Standard	20240104\EMPA.wiff	347000	95200	2000	N/A	123000	33000	1	0	1840	91.8
8	L		Quality Control	20240104\EMPA.wiff	2200	699	15	N/A	99100	23500	1	0	15.4	102
9	M		Quality Control	20240104\EMPA.wiff	139000	35000	800	N/A	122000	30900	1	0	741	92.7
10	H		Quality Control	20240104\EMPA.wiff	248000	57500	1500	N/A	120000	31100	1	0	1350	90
131	D1-1		Unknown	20240104\EMPA.wiff	456	197	N/A	N/A	58600	11500		0	5.99	N/A
132	D1-2		Unknown	20240104\EMPA.wiff	1000	272	N/A	N/A	32700	5760		0	20.9	N/A
133	D1-3		Unknown	20240104\EMPA.wiff	6970	1790	N/A	N/A	60700	11100		0	75.9	N/A
134	D1-4		Unknown	20240104\EMPA.wiff	11600	2730	N/A	N/A	67800	15800		0	113	N/A
135	D1-5		Unknown	20240104\EMPA.wiff	11200	2940	N/A	N/A	52700	9440		0	140	N/A
136	D1-6		Unknown	20240104\EMPA.wiff	24300	6970	N/A	N/A	106000	22200		0	150	N/A
137	D1-7		Unknown	20240104\EMPA.wiff	23100	5960	N/A	N/A	102000	25000		0	148	N/A
138	D1-8		Unknown	20240104\EMPA.wiff	8720	2140	N/A	N/A	104000	20800		0	55.8	N/A
139	D1-9		Unknown	20240104\EMPA.wiff	10900	2750	N/A	N/A	94000	22500		0	76.6	N/A
140	D1-10		Unknown	20240104\EMPA.wiff	1570	423	N/A	N/A	83200	19500		0	13.2	N/A
141	D1-11		Unknown	20240104\EMPA.wiff	517	203	N/A	N/A	73300	17400		0	5.51	N/A
142	D1-12		Unknown	20240104\EMPA.wiff	1190	297	N/A	N/A	76300	18900		0	11.1	N/A
143	D1-13		Unknown	20240104\EMPA.wiff	68.4	77.7	N/A	N/A	21500	4820		0	2.99	N/A
146	D2-1		Unknown	20240104\EMPA.wiff	8820	2270	N/A	N/A	50800	10900		0	114	N/A
147	D2-2		Unknown	20240104\EMPA.wiff	17800	4460	N/A	N/A	46400	10700		0	251	N/A
148	D2-3		Unknown	20240104\EMPA.wiff	24000	6130	N/A	N/A	61200	14600		0	257	N/A
149	D2-4		Unknown	20240104\EMPA.wiff	20600	5350	N/A	N/A	48100	10900		0	280	N/A
150	D2-5		Unknown	20240104\EMPA.wiff	14800	3970	N/A	N/A	42000	9850		0	231	N/A
151	D2-6		Unknown	20240104\EMPA.wiff	11100	3420	N/A	N/A	44700	11400		0	163	N/A
152	D2-7		Unknown	20240104\EMPA.wiff	5340	1420	N/A	N/A	44200	10000		0	79.9	N/A
153	D2-8		Unknown	20240104\EMPA.wiff	7370	2050	N/A	N/A	45600	11500		0	106	N/A
154	D2-9		Unknown	20240104\EMPA.wiff	11300	2670	N/A	N/A	37400	8750		0	198	N/A
155	D2-10		Unknown	20240104\EMPA.wiff	1340	349	N/A	N/A	37400	9410		0	24.2	N/A
156	D2-11		Unknown	20240104\EMPA.wiff	1710	384	N/A	N/A	92600	24900		0	13	N/A
157	D2-12		Unknown	20240104\EMPA.wiff	739	309	N/A	N/A	54900	13500		0	9.69	N/A
158	D2-13		Unknown	20240104\EMPA.wiff	158	111	N/A	N/A	37000	9570		0	3.7	N/A
161	D3-1		Unknown	20240104\EMPA.wiff	4840	1250	N/A	N/A	51200	11000		0	62.5	N/A
162	D3-2		Unknown	20240104\EMPA.wiff	10500	2720	N/A	N/A	50700	9910		0	136	N/A
163	D3-3		Unknown	20240104\EMPA.wiff	9320	2410	N/A	N/A	50200	11900		0	122	N/A
164	D3-4		Unknown	20240104\EMPA.wiff	8740	2140	N/A	N/A	38600	8990		0	149	N/A
165	D3-5		Unknown	20240104\EMPA.wiff	6720	1750	N/A	N/A	41100	10100		0	108	N/A
166	D3-6		Unknown	20240104\EMPA.wiff	5260	1430	N/A	N/A	42800	9010		0	81.1	N/A
167	D3-7		Unknown	20240104\EMPA.wiff	5860	1570	N/A	N/A	43600	10800		0	88.5	N/A
168	D3-8		Unknown	20240104\EMPA.wiff	7890	2170	N/A	N/A	84700	18600		0	61.7	N/A
169	D3-9		Unknown	20240104\EMPA.wiff	8940	2510	N/A	N/A	81600	19700		0	72.4	N/A
170	D3-10		Unknown	20240104\EMPA.wiff	981	287	N/A	N/A	38400	9380		0	17.6	N/A
171	D3-11		Unknown	20240104\EMPA.wiff	870	282	N/A	N/A	46900	12500		0	13	N/A
172	D3-12		Unknown	20240104\EMPA.wiff	635	226	N/A	N/A	36800	8940		0	12.2	N/A
173	D3-13		Unknown	20240104\EMPA.wiff	184	119	N/A	N/A	38300	9890		0	4.06	N/A
176	D4-1		Unknown	20240104\EMPA.wiff	5150	1220	N/A	N/A	100000	21900		0	34.4	N/A
177	D4-2		Unknown	20240104\EMPA.wiff	10700	3090	N/A	N/A	111000	21900		0	63.9	N/A
178	D4-3		Unknown	20240104\EMPA.wiff	19100	4830	N/A	N/A	94600	17900		0	133	N/A
179	D4-4		Unknown	20240104\EMPA.wiff	16400	4350	N/A	N/A	57300	12500		0	188	N/A
180	D4-5		Unknown	20240104\EMPA.wiff	15000	3850	N/A	N/A	52200	10500		0	188	N/A
181	D4-6		Unknown	20240104\EMPA.wiff	7550	1900	N/A	N/A	43200	10300		0	115	N/A
182	D4-7		Unknown	20240104\EMPA.wiff	7620	2110	N/A	N/A	49200	13500		0	102	N/A
183	D4-8		Unknown	20240104\EMPA.wiff	15500	4090	N/A	N/A	71500	17700		0	142	N/A
184	D4-9		Unknown	20240104\EMPA.wiff	16500	3650	N/A	N/A	78800	17900		0	138	N/A
185	D4-10		Unknown	20240104\EMPA.wiff	2360	735	N/A	N/A	80300	19800		0	20.1	N/A
186	D4-11		Unknown	20240104\EMPA.wiff	715	340	N/A	N/A	41400	10400		0	12.2	N/A
187	D4-12		Unknown	20240104\EMPA.wiff	1610	383	N/A	N/A	80000	19800		0	14.1	N/A
188	D4-13		Unknown	20240104\EMPA.wiff	1380	400	N/A	N/A	68900	17300		0	14	N/A
191	D5-1		Unknown	20240104\EMPA.wiff	2420	604	N/A	N/A	34700	8120		0	46.5	N/A
192	D5-2		Unknown	20240104\EMPA.wiff	8580	2380	N/A	N/A	39400	9230		0	143	N/A
193	D5-3		Unknown	20240104\EMPA.wiff	14300	3360	N/A	N/A	36900	9310		0	254	N/A
194	D5-4		Unknown	20240104\EMPA.wiff	20600	5290	N/A	N/A	40700	9710		0	330	N/A
195	D5-5		Unknown	20240104\EMPA.wiff	6560	1530	N/A	N/A	20700	4380		0	208	N/A
196	D5-6		Unknown	20240104\EMPA.wiff	10100	2300	N/A	N/A	36800	8000		0	181	N/A
197	D5-7		Unknown	20240104\EMPA.wiff	9240	2180	N/A	N/A	76400	19200		0	79.9	N/A
198	D5-8		Unknown	20240104\EMPA.wiff	4920	1290	N/A	N/A	38700	8190		0	84	N/A
199	D5-9		Unknown	20240104\EMPA.wiff	6120	1710	N/A	N/A	30600	8080		0	132	N/A
200	D5-10		Unknown	20240104\EMPA.wiff	1580	415	N/A	N/A	25800	6290		0	40.8	N/A
201	D5-11		Unknown	20240104\EMPA.wiff	2290	728	N/A	N/A	69700	15500		0	22.4	N/A
202	D5-12		Unknown	20240104\EMPA.wiff	2450	551	N/A	N/A	106000	26200		0	16	N/A
203	D5-13		Unknown	20240104\EMPA.wiff	525	172	N/A	N/A	34800	8260		0	10.7	N/A
206	D6-1		Unknown	20240104\EMPA.wiff	7850	2150	N/A	N/A	51000	10800		0	101	N/A
207	D6-2		Unknown	20240104\EMPA.wiff	26100	8020	N/A	N/A	85200	20300		0	201	N/A
208	D6-3		Unknown	20240104\EMPA.wiff	31400	8200	N/A	N/A	71900	15400		0	286	N/A
209	D6-4		Unknown	20240104\EMPA.wiff	35500	8470	N/A	N/A	80200	18800		0	290	N/A
210	D6-5		Unknown	20240104\EMPA.wiff	29300	7740	N/A	N/A	85600	19700		0	224	N/A
211	D6-6		Unknown	20240104\EMPA.wiff	20300	4770	N/A	N/A	72900	16100		0	183	N/A
212	D6-7		Unknown	20240104\EMPA.wiff	17500	4670	N/A	N/A	75900	18000		0	151	N/A
213	D6-8		Unknown	20240104\EMPA.wiff	12900	3650	N/A	N/A	74800	17500		0	113	N/A
214	D6-9		Unknown	20240104\EMPA.wiff	8360	2260	N/A	N/A	69100	15600		0	79.9	N/A
215	D6-10		Unknown	20240104\EMPA.wiff	593	144	N/A	N/A	19800	4490		0	20.5	N/A
216	D6-11		Unknown	20240104\EMPA.wiff	224	130	N/A	N/A	18500	3730		0	8.81	N/A
218	D6-12		Unknown	20240104\EMPA.wiff	580	258	N/A	N/A	20600	4760		0	19.3	N/A
219	D6-13		Unknown	20240104\EMPA.wiff	2260	619	N/A	N/A	68100	16300		0	22.6	N/A

## Sheet: SOR control
	Sample Name	Sample ID	Sample Type	File Name	Analyte Peak Area (counts)	Analyte Peak Height (cps)	Analyte Concentration (ng/mL)	Standard Query Status	IS Peak Area (counts)	IS Peak Height (cps)	Use Record	Record Modified	Calculated Concentration (ng/mL)	Accuracy (%)
1	0.5		Standard	20230911SUO.wiff	24900	7390	0.5	N/A	9640000	3070000	1	0	0.497	99.4
2	1		Standard	20230911SUO.wiff	108000	27600	1	N/A	11700000	3840000	0	0	7.99	799
3	2		Standard	20230911SUO.wiff	173000	54900	2	N/A	12600000	4420000	0	0	13.1	654
4	5		Standard	20230911SUO.wiff	87300	29400	5	N/A	12800000	4370000	1	1	5.27	105
5	10		Quality Control	20230911SUO.wiff	153000	45500	10	N/A	13600000	3730000	1	0	10.2	102
6	15		Standard	20230911SUO.wiff	294000	79600	15	N/A	15000000	4780000	0	0	19.6	131
7	50		Standard	20230911SUO.wiff	719000	211000	50	N/A	14900000	4100000	1	0	52	104
8	200		Standard	20230911SUO.wiff	2180000	709000	200	N/A	12800000	3810000	1	0	190	95.1
9	800		Standard	20230911SUO.wiff	8080000	2300000	800	N/A	11700000	3730000	1	0	774	96.7
10	1500		Quality Control	20230911SUO.wiff	14400000	4030000	1500	N/A	11300000	3530000	1	0	1430	95.2
11	2000		Standard	20230911SUO.wiff	18300000	5000000	2000	N/A	10700000	3280000	1	0	1920	95.9
12	3750		Quality Control	20230911SUO.wiff	28400000	7880000	3750	N/A	8760000	3040000	1	1	3650	97.3
13	4000		Standard	20230911SUO.wiff	29800000	7940000	4000	N/A	8970000	2670000	1	1	3740	93.5
14	5000		Standard	20230911SUO.wiff	32300000	8620000	5000	N/A	6630000	1930000	1	1	5490	110
15	C1-1		Unknown	20230911DWYSUO.wiff	1890000	607000	N/A	N/A	11600000	3880000		0	181	N/A
16	C1-2		Unknown	20230911DWYSUO.wiff	6500000	2180000	N/A	N/A	14400000	4290000		0	505	N/A
17	C1-3		Unknown	20230911DWYSUO.wiff	11900000	3860000	N/A	N/A	13700000	4220000		0	977	N/A
18	C1-4		Unknown	20230911DWYSUO.wiff	9120000	2610000	N/A	N/A	13700000	3980000		0	747	N/A
19	C1-5		Unknown	20230911DWYSUO.wiff	7930000	2770000	N/A	N/A	12900000	4000000		0	692	N/A
20	C1-6		Unknown	20230911DWYSUO.wiff	7470000	2490000	N/A	N/A	13300000	4220000		0	631	N/A
21	C1-7		Unknown	20230911DWYSUO.wiff	7890000	2470000	N/A	N/A	13600000	4720000		0	651	N/A
22	C1-8		Unknown	20230911DWYSUO.wiff	8180000	2680000	N/A	N/A	14000000	4130000		0	656	N/A
23	C1-9		Unknown	20230911DWYSUO.wiff	8270000	2780000	N/A	N/A	14300000	4430000		0	647	N/A
24	C1-10		Unknown	20230911DWYSUO.wiff	5050000	1510000	N/A	N/A	15100000	4780000		0	375	N/A
25	C1-11		Unknown	20230911DWYSUO.wiff	3760000	1250000	N/A	N/A	12600000	4140000		0	333	N/A
26	C1-12		Unknown	20230911DWYSUO.wiff	1680000	561000	N/A	N/A	13100000	4570000		0	141	N/A
27	C1-13		Unknown	20230911DWYSUO.wiff	534000	186000	N/A	N/A	12100000	3840000		0	47.4	N/A
28	C1-14		Unknown	20230911DWYSUO.wiff	362000	118000	N/A	N/A	11800000	4150000		0	32.1	N/A
29	C1-15		Unknown	20230911DWYSUO.wiff	240000	77000	N/A	N/A	15200000	4580000		0	15.4	N/A
30	C1-16		Unknown	20230911DWYSUO.wiff	386000	133000	N/A	N/A	12600000	4230000		0	32.1	N/A
31	C1-17		Unknown	20230911DWYSUO.wiff	260000	77400	N/A	N/A	13900000	4330000		0	18.6	N/A
32	C1-18		Unknown	20230911DWYSUO.wiff	395000	133000	N/A	N/A	12100000	3780000		0	34.4	N/A
33	C2-1		Unknown	20230911DWYSUO.wiff	1590000	562000	N/A	N/A	12200000	3930000		0	144	N/A
34	C2-2		Unknown	20230911DWYSUO.wiff	607000	225000	N/A	N/A	1700000	551000		0	400	N/A
35	C2-3		Unknown	20230911DWYSUO.wiff	6770000	2240000	N/A	N/A	11100000	3410000		0	687	N/A
36	C2-4		Unknown	20230911DWYSUO.wiff	9220000	2820000	N/A	N/A	12900000	3850000		0	804	N/A
37	C2-5		Unknown	20230911DWYSUO.wiff	10600000	3140000	N/A	N/A	13600000	4380000		0	871	N/A
38	C2-6		Unknown	20230911DWYSUO.wiff	10100000	3050000	N/A	N/A	13500000	3880000		0	841	N/A
39	C2-7		Unknown	20230911DWYSUO.wiff	9550000	3130000	N/A	N/A	13200000	4320000		0	810	N/A
40	C2-8		Unknown	20230911DWYSUO.wiff	9700000	3100000	N/A	N/A	12600000	3920000		0	863	N/A
41	C2-9		Unknown	20230911DWYSUO.wiff	8920000	2780000	N/A	N/A	12000000	3820000		0	832	N/A
42	C2-10		Unknown	20230911DWYSUO.wiff	6650000	2320000	N/A	N/A	13400000	4170000		0	555	N/A
43	C2-11		Unknown	20230911DWYSUO.wiff	5060000	1640000	N/A	N/A	11100000	3410000		0	510	N/A
44	C2-12		Unknown	20230911DWYSUO.wiff	2220000	737000	N/A	N/A	11700000	3810000		0	211	N/A
45	C2-13		Unknown	20230911DWYSUO.wiff	1330000	429000	N/A	N/A	11100000	3460000		0	133	N/A
46	C2-14		Unknown	20230911DWYSUO.wiff	389000	124000	N/A	N/A	11100000	3500000		0	36.9	N/A
47	C2-15		Unknown	20230911DWYSUO.wiff	216000	74700	N/A	N/A	14100000	4600000		0	14.8	N/A
48	C2-16		Unknown	20230911DWYSUO.wiff	1700000	644000	N/A	N/A	12000000	3940000		0	157	N/A
49	C2-17		Unknown	20230911DWYSUO.wiff	517000	165000	N/A	N/A	12600000	4220000		0	43.7	N/A
50	C2-18		Unknown	20230911DWYSUO.wiff	482000	168000	N/A	N/A	14900000	4650000		0	34	N/A
51	C3-1		Unknown	20230911DWYSUO.wiff	1060000	346000	N/A	N/A	11900000	3770000		0	97.4	N/A
52	C3-2		Unknown	20230911DWYSUO.wiff	4080000	1240000	N/A	N/A	15000000	4370000		0	304	N/A
53	C3-3		Unknown	20230911DWYSUO.wiff	7030000	2140000	N/A	N/A	11700000	3530000		0	673	N/A
54	C3-4		Unknown	20230911DWYSUO.wiff	8900000	2740000	N/A	N/A	12800000	3630000		0	783	N/A
55	C3-5		Unknown	20230911DWYSUO.wiff	11600000	3300000	N/A	N/A	12000000	3290000		0	1080	N/A
56	C3-6		Unknown	20230911DWYSUO.wiff	12800000	3810000	N/A	N/A	11600000	3780000		0	1250	N/A
57	C3-7		Unknown	20230911DWYSUO.wiff	13900000	4390000	N/A	N/A	13400000	4030000		0	1170	N/A
58	C3-8		Unknown	20230911DWYSUO.wiff	11600000	3860000	N/A	N/A	12100000	3580000		0	1070	N/A
59	C3-9		Unknown	20230911DWYSUO.wiff	12400000	3630000	N/A	N/A	11100000	3160000		0	1250	N/A
60	C3-10		Unknown	20230911DWYSUO.wiff	12100000	3670000	N/A	N/A	12500000	4190000		0	1090	N/A
61	C3-11		Unknown	20230911DWYSUO.wiff	11700000	3530000	N/A	N/A	13000000	3850000		0	1010	N/A
62	C3-12		Unknown	20230911DWYSUO.wiff	5170000	1750000	N/A	N/A	12800000	4200000		0	454	N/A
63	C3-13		Unknown	20230911DWYSUO.wiff	1850000	597000	N/A	N/A	11500000	3480000		0	178	N/A
64	C3-14		Unknown	20230911DWYSUO.wiff	783000	259000	N/A	N/A	10900000	3460000		0	78.5	N/A
65	C3-15		Unknown	20230911DWYSUO.wiff	577000	186000	N/A	N/A	14300000	4830000		0	43	N/A
66	C3-16		Unknown	20230911DWYSUO.wiff	1440000	427000	N/A	N/A	13400000	4000000		0	119	N/A
67	C3-17		Unknown	20230911DWYSUO.wiff	395000	126000	N/A	N/A	13800000	4330000		0	29.9	N/A
68	C3-18		Unknown	20230911DWYSUO.wiff	217000	74200	N/A	N/A	12100000	3950000		0	17.9	N/A
69	C4-1		Unknown	20230911DWYSUO.wiff	1060000	361000	N/A	N/A	11600000	3870000		0	101	N/A
70	C4-2		Unknown	20230911DWYSUO.wiff	4470000	1510000	N/A	N/A	13900000	4420000		0	359	N/A
71	C4-3		Unknown	20230911DWYSUO.wiff	5710	1260	N/A	N/A	7990	1390		0	802	N/A
72	C4-4		Unknown	20230911DWYSUO.wiff	8260000	2640000	N/A	N/A	11100000	3630000		0	833	N/A
73	C4-5		Unknown	20230911DWYSUO.wiff	10500000	3340000	N/A	N/A	12000000	3670000		0	984	N/A
74	C4-6		Unknown	20230911DWYSUO.wiff	11100000	3380000	N/A	N/A	12100000	3420000		0	1030	N/A
75	C4-7		Unknown	20230911DWYSUO.wiff	8550000	2500000	N/A	N/A	12000000	3930000		0	797	N/A
76	C4-8		Unknown	20230911DWYSUO.wiff	8340000	2690000	N/A	N/A	12300000	3920000		0	759	N/A
77	C4-9		Unknown	20230911DWYSUO.wiff	8830000	3190000	N/A	N/A	12400000	3860000		0	799	N/A
78	C4-10		Unknown	20230911DWYSUO.wiff	6820000	1940000	N/A	N/A	13400000	4250000		0	570	N/A
79	C4-11		Unknown	20230911DWYSUO.wiff	5240000	1550000	N/A	N/A	11200000	3620000		0	525	N/A
80	C4-12		Unknown	20230911DWYSUO.wiff	2220000	688000	N/A	N/A	10600000	3300000		0	234	N/A
81	C4-13		Unknown	20230911DWYSUO.wiff	988000	321000	N/A	N/A	11300000	3790000		0	96.2	N/A
82	C4-14		Unknown	20230911DWYSUO.wiff	498000	168000	N/A	N/A	11200000	4190000		0	47.4	N/A
83	C4-15		Unknown	20230911DWYSUO.wiff	4980000	1620000	N/A	N/A	13000000	4050000		0	427	N/A
84	C4-16		Unknown	20230911DWYSUO.wiff	3460000	1100000	N/A	N/A	11700000	3660000		0	330	N/A
85	C4-17		Unknown	20230911DWYSUO.wiff	756000	243000	N/A	N/A	13000000	3970000		0	63.1	N/A
86	C4-18		Unknown	20230911DWYSUO.wiff	2010000	653000	N/A	N/A	12200000	4100000		0	183	N/A
87	C5-1		Unknown	20230911DWYSUO.wiff	2400000	873000	N/A	N/A	15400000	4710000		0	174	N/A
88	C5-2		Unknown	20230911DWYSUO.wiff	4030000	1280000	N/A	N/A	12900000	4360000		0	348	N/A
89	C5-3		Unknown	20230911DWYSUO.wiff	7250000	2170000	N/A	N/A	16400000	4910000		0	495	N/A
90	C5-4		Unknown	20230911DWYSUO.wiff	8060000	2430000	N/A	N/A	12500000	3810000		0	721	N/A
91	C5-5		Unknown	20230911DWYSUO.wiff	7550000	2350000	N/A	N/A	13300000	3910000		0	639	N/A
92	C5-6		Unknown	20230911DWYSUO.wiff	7150000	2250000	N/A	N/A	13900000	4050000		0	576	N/A
93	C5-7		Unknown	20230911DWYSUO.wiff	5790000	1900000	N/A	N/A	12400000	3540000		0	522	N/A
94	C5-8		Unknown	20230911DWYSUO.wiff	5790000	1750000	N/A	N/A	12800000	3640000		0	506	N/A
95	C5-9		Unknown	20230911DWYSUO.wiff	6370000	2000000	N/A	N/A	13600000	4090000		0	526	N/A
96	C5-10		Unknown	20230911DWYSUO.wiff	3590000	1100000	N/A	N/A	15200000	4490000		0	263	N/A
97	C5-11		Unknown	20230911DWYSUO.wiff	2630000	887000	N/A	N/A	12500000	4180000		0	234	N/A
98	C5-12		Unknown	20230911DWYSUO.wiff	738000	248000	N/A	N/A	11200000	4020000		0	71.8	N/A
99	C5-13		Unknown	20230911DWYSUO.wiff	333000	113000	N/A	N/A	13700000	4410000		0	25	N/A
100	C5-14		Unknown	20230911DWYSUO.wiff	163000	50900	N/A	N/A	12400000	4430000		0	12.4	N/A
101	C5-15		Unknown	20230911DWYSUO.wiff	217000	62300	N/A	N/A	15500000	5060000		0	13.4	N/A
102	C5-16		Unknown	20230911DWYSUO.wiff	1500000	480000	N/A	N/A	13900000	4240000		0	119	N/A
103	C5-17		Unknown	20230911DWYSUO.wiff	114000	35200	N/A	N/A	15900000	5100000		0	5.69	N/A
104	C5-18		Unknown	20230911DWYSUO.wiff	789000	278000	N/A	N/A	13600000	4680000		0	63	N/A
105	C6-1		Unknown	20230911DWYSUO.wiff	1080000	360000	N/A	N/A	10600000	3550000		0	113	N/A
106	C6-2		Unknown	20230911DWYSUO.wiff	3880000	1130000	N/A	N/A	17100000	4770000		0	254	N/A
107	C6-3		Unknown	20230911DWYSUO.wiff	5210000	1600000	N/A	N/A	15200000	4560000		0	383	N/A
108	C6-4		Unknown	20230911DWYSUO.wiff	5330000	1590000	N/A	N/A	12800000	3960000		0	468	N/A
109	C6-5		Unknown	20230911DWYSUO.wiff	12600000	3710000	N/A	N/A	14900000	4400000		0	954	N/A
110	C6-6		Unknown	20230911DWYSUO.wiff	7270000	2060000	N/A	N/A	20000000	5440000		0	406	N/A
111	C6-7		Unknown	20230911DWYSUO.wiff	5140000	1520000	N/A	N/A	14700000	4090000		0	392	N/A
112	C6-8		Unknown	20230911DWYSUO.wiff	4290000	1290000	N/A	N/A	14000000	4560000		0	342	N/A
113	C6-9		Unknown	20230911DWYSUO.wiff	4820000	1450000	N/A	N/A	14900000	4630000		0	361	N/A
114	C6-10		Unknown	20230911DWYSUO.wiff	3710000	1080000	N/A	N/A	15900000	4610000		0	260	N/A
115	C6-11		Unknown	20230911DWYSUO.wiff	2710000	805000	N/A	N/A	15000000	4660000		0	201	N/A
116	C6-12		Unknown	20230911DWYSUO.wiff	1580000	481000	N/A	N/A	14400000	4150000		0	121	N/A
117	C6-13		Unknown	20230911DWYSUO.wiff	947000	313000	N/A	N/A	13400000	4060000		0	77.1	N/A
118	C6-14		Unknown	20230911DWYSUO.wiff	595000	189000	N/A	N/A	13600000	4240000		0	47	N/A
119	C6-15		Unknown	20230911DWYSUO.wiff	180000	63700	N/A	N/A	15900000	4780000		0	10.3	N/A
120	C6-16		Unknown	20230911DWYSUO.wiff	589000	197000	N/A	N/A	15100000	4920000		0	41.6	N/A
121	C6-17		Unknown	20230911DWYSUO.wiff	132000	45100	N/A	N/A	9880000	3180000		0	12.6	N/A
122	C6-18		Unknown	20230911DWYSUO.wiff	165000	54800	N/A	N/A	14900000	4310000		0	10	N/A

## Sheet: EMPA-SOR experiment
	Sample Name	Sample ID	Sample Type	File Name	Analyte Peak Area (counts)	Analyte Peak Height (cps)	Analyte Concentration (ng/mL)	Standard Query Status	IS Peak Area (counts)	IS Peak Height (cps)	Use Record	Record Modified	Calculated Concentration (ng/mL)	Accuracy (%)
1	5		Standard	20231124\SUO.wiff	11000	3320	5	N/A	373000	114000	1	0	5.05	101
2	15		Standard	20231124\SUO.wiff	30700	10800	15	N/A	390000	125000	0	0	20.4	136
3	50		Standard	20231124\SUO.wiff	65100	18800	50	N/A	412000	117000	1	0	44.8	89.6
4	200		Standard	20231124\SUO.wiff	239000	70700	200	N/A	382000	111000	1	0	189	94.6
5	800		Standard	20231124\SUO.wiff	1020000	322000	800	N/A	358000	105000	1	1	873	109
6	2000		Standard	20231124\SUO.wiff	2520000	802000	2000	N/A	356000	106000	1	1	2180	109
7	4000		Standard	20231124\SUO.wiff	4640000	1430000	4000	N/A	352000	101000	1	0	4070	102
8	5000		Standard	20231124\SUO.wiff	5670000	1560000	5000	N/A	371000	105000	1	0	4730	94.5
9	L		Quality Control	20231124\SUO.wiff	15600	4570	10	N/A	364000	115000	1	0	9.21	92.1
10	M		Quality Control	20231124\SUO.wiff	2110000	633000	1500	N/A	378000	117000	1	0	1720	115
11	H		Quality Control	20231124\SUO.wiff	3970000	1190000	3750	N/A	362000	115000	1	0	3390	90.5
156	B1-1		Unknown	20231124\SUO.wiff	504000	149000	N/A	N/A	390000	116000		0	396	N/A
157	B1-2		Unknown	20231124\SUO.wiff	749000	228000	N/A	N/A	338000	105000		0	681	N/A
158	B1-3		Unknown	20231124\SUO.wiff	1330000	407000	N/A	N/A	350000	108000		0	1170	N/A
159	B1-4		Unknown	20231124\SUO.wiff	1380000	407000	N/A	N/A	359000	106000		0	1190	N/A
160	B1-5		Unknown	20231124\SUO.wiff	1780000	611000	N/A	N/A	332000	100000		0	1650	N/A
161	B1-6		Unknown	20231124\SUO.wiff	1980000	581000	N/A	N/A	369000	114000		0	1660	N/A
162	B1-7		Unknown	20231124\SUO.wiff	2340000	681000	N/A	N/A	431000	134000		0	1680	N/A
163	B1-8		Unknown	20231124\SUO.wiff	1340000	383000	N/A	N/A	363000	114000		0	1140	N/A
164	B1-9		Unknown	20231124\SUO.wiff	1100000	331000	N/A	N/A	329000	101000		0	1030	N/A
165	B1-10		Unknown	20231124\SUO.wiff	858000	267000	N/A	N/A	326000	97600		0	810	N/A
166	B1-11		Unknown	20231124\SUO.wiff	707000	210000	N/A	N/A	364000	112000		0	596	N/A
167	B1-12		Unknown	20231124\SUO.wiff	317000	92200	N/A	N/A	404000	122000		0	238	N/A
168	B1-13		Unknown	20231124\SUO.wiff	136000	43400	N/A	N/A	334000	111000		0	122	N/A
169	B1-14		Unknown	20231124\SUO.wiff	53800	15100	N/A	N/A	314000	90900		0	49.1	N/A
170	B1-15		Unknown	20231124\SUO.wiff	565000	181000	N/A	N/A	324000	91000		0	535	N/A
171	B1-16		Unknown	20231124\SUO.wiff	316000	98700	N/A	N/A	323000	96000		0	298	N/A
172	B1-17		Unknown	20231124\SUO.wiff	42700	12300	N/A	N/A	289000	88900		0	41.6	N/A
173	B1-18		Unknown	20231124\SUO.wiff	10700	3450	N/A	N/A	328000	102000		0	6.06	N/A
174	B2-1		Unknown	20231124\SUO.wiff	168000	51500	N/A	N/A	347000	112000		0	146	N/A
175	B2-2		Unknown	20231124\SUO.wiff	332000	96000	N/A	N/A	365000	109000		0	278	N/A
176	B2-3		Unknown	20231124\SUO.wiff	686000	220000	N/A	N/A	376000	106000		0	560	N/A
177	B2-4		Unknown	20231124\SUO.wiff	574000	166000	N/A	N/A	303000	98100		0	581	N/A
178	B2-5		Unknown	20231124\SUO.wiff	921000	299000	N/A	N/A	384000	120000		0	738	N/A
179	B2-6		Unknown	20231124\SUO.wiff	740000	216000	N/A	N/A	393000	117000		0	578	N/A
180	B2-7		Unknown	20231124\SUO.wiff	927000	279000	N/A	N/A	326000	94900		0	875	N/A
181	B2-8		Unknown	20231124\SUO.wiff	740000	222000	N/A	N/A	329000	99700		0	692	N/A
182	B2-9		Unknown	20231124\SUO.wiff	765000	232000	N/A	N/A	353000	107000		0	666	N/A
183	B2-10		Unknown	20231124\SUO.wiff	625000	193000	N/A	N/A	348000	107000		0	553	N/A
184	B2-11		Unknown	20231124\SUO.wiff	432000	135000	N/A	N/A	291000	85000		0	455	N/A
185	B2-12		Unknown	20231124\SUO.wiff	159000	47000	N/A	N/A	389000	120000		0	123	N/A
186	B2-13		Unknown	20231124\SUO.wiff	172000	52400	N/A	N/A	329000	107000		0	158	N/A
187	B2-14		Unknown	20231124\SUO.wiff	21600	6970	N/A	N/A	370000	109000		0	14	N/A
188	B2-15		Unknown	20231124\SUO.wiff	22300	6720	N/A	N/A	292000	87400		0	19.6	N/A
189	B2-16		Unknown	20231124\SUO.wiff	26800	8380	N/A	N/A	337000	107000		0	20.5	N/A
190	B2-17		Unknown	20231124\SUO.wiff	20400	6440	N/A	N/A	344000	109000		0	14.3	N/A
191	B2-18		Unknown	20231124\SUO.wiff	7260	2460	N/A	N/A	373000	117000		0	1.98	N/A
192	B3-1		Unknown	20231124\SUO.wiff	154000	47200	N/A	N/A	390000	126000		0	118	N/A
193	B3-2		Unknown	20231124\SUO.wiff	323000	96700	N/A	N/A	280000	82200		0	353	N/A
194	B3-3		Unknown	20231124\SUO.wiff	610000	187000	N/A	N/A	336000	107000		0	557	N/A
195	B3-4		Unknown	20231124\SUO.wiff	875000	252000	N/A	N/A	332000	106000		0	811	N/A
196	B3-5		Unknown	20231124\SUO.wiff	1020000	331000	N/A	N/A	328000	99500		0	962	N/A
197	B3-6		Unknown	20231124\SUO.wiff	1130000	324000	N/A	N/A	345000	101000		0	1010	N/A
198	B3-7		Unknown	20231124\SUO.wiff	1280000	390000	N/A	N/A	345000	103000		0	1170	N/A
199	B3-8		Unknown	20231124\SUO.wiff	1200000	371000	N/A	N/A	316000	95400		0	1140	N/A
200	B3-9		Unknown	20231124\SUO.wiff	1070000	323000	N/A	N/A	329000	104000		0	1000	N/A
201	B3-10		Unknown	20231124\SUO.wiff	1240000	376000	N/A	N/A	364000	108000		0	1050	N/A
202	B3-11		Unknown	20231124\SUO.wiff	889000	269000	N/A	N/A	353000	104000		0	775	N/A
203	B3-12		Unknown	20231124\SUO.wiff	384000	118000	N/A	N/A	358000	111000		0	328	N/A
204	B3-13		Unknown	20231124\SUO.wiff	195000	68100	N/A	N/A	343000	111000		0	172	N/A
205	B3-14		Unknown	20231124\SUO.wiff	45400	15100	N/A	N/A	290000	89800		0	44.5	N/A
206	B3-15		Unknown	20231124\SUO.wiff	15700	5370	N/A	N/A	286000	86600		0	12.9	N/A
207	B3-16		Unknown	20231124\SUO.wiff	21900	6860	N/A	N/A	325000	103000		0	16.8	N/A
208	B3-17		Unknown	20231124\SUO.wiff	16500	5430	N/A	N/A	411000	122000		0	8.35	N/A
209	B3-18		Unknown	20231124\SUO.wiff	12700	4220	N/A	N/A	359000	112000		0	6.91	N/A
210	B4-1		Unknown	20231124\SUO.wiff	175000	54500	N/A	N/A	209000	68600		0	255	N/A
211	B4-2		Unknown	20231124\SUO.wiff	372000	114000	N/A	N/A	212000	65800		0	539	N/A
212	B4-3		Unknown	20231124\SUO.wiff	896000	264000	N/A	N/A	192000	57400		0	1440	N/A
213	B4-4		Unknown	20231124\SUO.wiff	1490000	433000	N/A	N/A	226000	68700		0	2040	N/A
214	B4-5		Unknown	20231124\SUO.wiff	2010000	609000	N/A	N/A	215000	64000		0	2890	N/A
215	B4-6		Unknown	20231124\SUO.wiff	2050000	625000	N/A	N/A	273000	85500		0	2320	N/A
216	B4-7		Unknown	20231124\SUO.wiff	1800000	477000	N/A	N/A	204000	61900		0	2740	N/A
217	B4-8		Unknown	20231124\SUO.wiff	1260000	376000	N/A	N/A	191000	56600		0	2030	N/A
218	B4-9		Unknown	20231124\SUO.wiff	1270000	375000	N/A	N/A	207000	58900		0	1900	N/A
219	B4-10		Unknown	20231124\SUO.wiff	1400000	463000	N/A	N/A	226000	70100		0	1920	N/A
220	B4-11		Unknown	20231124\SUO.wiff	963000	294000	N/A	N/A	189000	57600		0	1570	N/A
221	B4-12		Unknown	20231124\SUO.wiff	423000	137000	N/A	N/A	301000	93900		0	430	N/A
222	B4-13		Unknown	20231124\SUO.wiff	143000	43100	N/A	N/A	199000	62400		0	219	N/A
223	B4-14		Unknown	20231124\SUO.wiff	48100	15700	N/A	N/A	199000	55400		0	70.7	N/A
224	B4-15		Unknown	20231124\SUO.wiff	18600	6190	N/A	N/A	232000	75500		0	20.8	N/A
225	B4-16		Unknown	20231124\SUO.wiff	112000	32800	N/A	N/A	219000	74900		0	154	N/A
226	B4-17		Unknown	20231124\SUO.wiff	113000	36200	N/A	N/A	229000	70700		0	149	N/A
227	B4-18		Unknown	20231124\SUO.wiff	32900	9860	N/A	N/A	205000	66300		0	45.6	N/A
228	B5-1		Unknown	20231124\SUO.wiff	185000	58600	N/A	N/A	243000	78900		0	232	N/A
229	B5-2		Unknown	20231124\SUO.wiff	398000	135000	N/A	N/A	253000	77100		0	483	N/A
230	B5-3		Unknown	20231124\SUO.wiff	782000	222000	N/A	N/A	222000	66300		0	1080	N/A
231	B5-4		Unknown	20231124\SUO.wiff	1340000	384000	N/A	N/A	217000	67100		0	1900	N/A
232	B5-5		Unknown	20231124\SUO.wiff	1520000	492000	N/A	N/A	240000	75300		0	1950	N/A
233	B5-6		Unknown	20231124\SUO.wiff	1540000	446000	N/A	N/A	211000	60800		0	2250	N/A
234	B5-7		Unknown	20231124\SUO.wiff	1960000	586000	N/A	N/A	257000	81300		0	2360	N/A
235	B5-8		Unknown	20231124\SUO.wiff	1330000	392000	N/A	N/A	211000	68100		0	1950	N/A
236	B5-9		Unknown	20231124\SUO.wiff	1390000	429000	N/A	N/A	212000	66900		0	2020	N/A
237	B5-10		Unknown	20231124\SUO.wiff	1310000	426000	N/A	N/A	290000	88100		0	1400	N/A
238	B5-11		Unknown	20231124\SUO.wiff	1100000	344000	N/A	N/A	224000	69900		0	1510	N/A
239	B5-12		Unknown	20231124\SUO.wiff	349000	106000	N/A	N/A	218000	65100		0	491	N/A
240	B5-13		Unknown	20231124\SUO.wiff	146000	45500	N/A	N/A	246000	82900		0	179	N/A
241	B5-14		Unknown	20231124\SUO.wiff	5410	1790	N/A	N/A	25400	8380		0	61.8	N/A
242	B5-15		Unknown	20231124\SUO.wiff	16000	5940	N/A	N/A	275000	86200		0	14	N/A
243	B5-16		Unknown	20231124\SUO.wiff	279000	88700	N/A	N/A	256000	82500		0	333	N/A
244	B5-17		Unknown	20231124\SUO.wiff	48400	15100	N/A	N/A	241000	69600		0	58.1	N/A
245	B5-18		Unknown	20231124\SUO.wiff	170000	50700	N/A	N/A	243000	74900		0	212	N/A
246	B6-1		Unknown	20131124\SUO.wiff	111000	33500	N/A	N/A	219000	68100		0	153	N/A
247	B6-2		Unknown	20131124\SUO.wiff	229000	70100	N/A	N/A	220000	73900		0	318	N/A
248	B6-3		Unknown	20131124\SUO.wiff	570000	180000	N/A	N/A	203000	66500		0	866	N/A
249	B6-4		Unknown	20131124\SUO.wiff	893000	301000	N/A	N/A	213000	65800		0	1290	N/A
250	B6-5		Unknown	20131124\SUO.wiff	1020000	295000	N/A	N/A	215000	63400		0	1470	N/A
251	B6-6		Unknown	20131124\SUO.wiff	1540000	485000	N/A	N/A	219000	70700		0	2180	N/A
252	B6-7		Unknown	20131124\SUO.wiff	1350000	415000	N/A	N/A	194000	65100		0	2150	N/A
253	B6-8		Unknown	20131124\SUO.wiff	970000	298000	N/A	N/A	200000	62500		0	1490	N/A
254	B6-9		Unknown	20131124\SUO.wiff	1130000	380000	N/A	N/A	209000	65200		0	1660	N/A
255	B6-10		Unknown	20131124\SUO.wiff	843000	268000	N/A	N/A	218000	65300		0	1190	N/A
256	B6-11		Unknown	20131124\SUO.wiff	918000	279000	N/A	N/A	187000	61000		0	1520	N/A
257	B6-12		Unknown	20131124\SUO.wiff	709000	251000	N/A	N/A	234000	77200		0	932	N/A
258	B6-13		Unknown	20131124\SUO.wiff	260000	87700	N/A	N/A	187000	61800		0	425	N/A
259	B6-14		Unknown	20131124\SUO.wiff	22200	6740	N/A	N/A	214000	69400		0	28	N/A
260	B6-15		Unknown	20131124\SUO.wiff	6160	1920	N/A	N/A	180000	55100		0	6.56	N/A
261	B6-16		Unknown	20131124\SUO.wiff	12900	4420	N/A	N/A	170000	54400		0	19.5	N/A
262	B6-17		Unknown	20131124\SUO.wiff	6730	2380	N/A	N/A	217000	70100		0	5.53	N/A
263	B6-18		Unknown	20131124\SUO.wiff	10800	3840	N/A	N/A	201000	67600		0	12.6	N/A

## Sheet: HEN-SOR experiment
	Sample Name	Sample ID	Sample Type	File Name	Analyte Peak Area (counts)	Analyte Peak Height (cps)	Analyte Concentration (ng/mL)	Standard Query Status	IS Peak Area (counts)	IS Peak Height (cps)	Use Record	Record Modified	Calculated Concentration (ng/mL)	Accuracy (%)
1	0.5		Standard	20230911SUO.wiff	24900	7390	0.5	N/A	9640000	3070000	1	0	0.497	99.4
2	1		Standard	20230911SUO.wiff	108000	27600	1	N/A	11700000	3840000	0	0	7.99	799
3	2		Standard	20230911SUO.wiff	173000	54900	2	N/A	12600000	4420000	0	0	13.1	654
4	5		Standard	20230911SUO.wiff	87300	29400	5	N/A	12800000	4370000	1	1	5.27	105
5	10		Quality Control	20230911SUO.wiff	153000	45500	10	N/A	13600000	3730000	1	0	10.2	102
6	15		Standard	20230911SUO.wiff	294000	79600	15	N/A	15000000	4780000	0	0	19.6	131
7	50		Standard	20230911SUO.wiff	719000	211000	50	N/A	14900000	4100000	1	0	52	104
8	200		Standard	20230911SUO.wiff	2180000	709000	200	N/A	12800000	3810000	1	0	190	95.1
9	800		Standard	20230911SUO.wiff	8080000	2300000	800	N/A	11700000	3730000	1	0	774	96.7
10	1500		Quality Control	20230911SUO.wiff	14400000	4030000	1500	N/A	11300000	3530000	1	0	1430	95.2
11	2000		Standard	20230911SUO.wiff	18300000	5000000	2000	N/A	10700000	3280000	1	0	1920	95.9
12	3750		Quality Control	20230911SUO.wiff	28400000	7880000	3750	N/A	8760000	3040000	1	1	3650	97.3
13	4000		Standard	20230911SUO.wiff	29800000	7940000	4000	N/A	8970000	2670000	1	1	3740	93.5
14	5000		Standard	20230911SUO.wiff	32300000	8620000	5000	N/A	6630000	1930000	1	1	5490	110
15	D1-1		Unknown	20230912DWYSUO.wiff	1290000	365000	N/A	N/A	7670000	2390000		0	186	N/A
16	D1-2		Unknown	20230912DWYSUO.wiff	3210000	877000	N/A	N/A	7610000	2230000		0	473	N/A
17	D1-3		Unknown	20230912DWYSUO.wiff	6260000	1790000	N/A	N/A	7360000	2350000		0	955	N/A
18	D1-4		Unknown	20230912DWYSUO.wiff	6690000	2000000	N/A	N/A	8280000	2530000		0	907	N/A
19	D1-5		Unknown	20230912DWYSUO.wiff	6860000	2160000	N/A	N/A	7770000	2380000		0	991	N/A
20	D1-6		Unknown	20230912DWYSUO.wiff	6900000	1990000	N/A	N/A	7680000	2380000		0	1010	N/A
21	D1-7		Unknown	20230912DWYSUO.wiff	6990000	2180000	N/A	N/A	8050000	2510000		0	975	N/A
22	D1-8		Unknown	20230912DWYSUO.wiff	6680000	1860000	N/A	N/A	7550000	2360000		0	995	N/A
23	D1-9		Unknown	20230912DWYSUO.wiff	6470000	1750000	N/A	N/A	7930000	2540000		0	916	N/A
24	D1-10		Unknown	20230912DWYSUO.wiff	5200000	1570000	N/A	N/A	8110000	2540000		0	719	N/A
25	D1-11		Unknown	20230912DWYSUO.wiff	4300000	1340000	N/A	N/A	7970000	2530000		0	606	N/A
26	D1-12		Unknown	20230912DWYSUO.wiff	1580000	462000	N/A	N/A	8590000	2740000		0	205	N/A
27	D1-13		Unknown	20230912DWYSUO.wiff	770000	251000	N/A	N/A	7910000	2260000		0	107	N/A
28	D1-14		Unknown	20230912DWYSUO.wiff	484000	139000	N/A	N/A	8020000	2410000		0	65.6	N/A
29	D1-15		Unknown	20230912DWYSUO.wiff	180000	47300	N/A	N/A	8070000	2450000		0	22.7	N/A
30	D1-16		Unknown	20230912DWYSUO.wiff	2150000	619000	N/A	N/A	7570000	2340000		0	317	N/A
31	D1-17		Unknown	20230912DWYSUO.wiff	435000	134000	N/A	N/A	7980000	2290000		0	59	N/A
32	D1-18		Unknown	20230912DWYSUO.wiff	1370000	413000	N/A	N/A	7700000	2480000		0	198	N/A
33	D2-1		Unknown	20230912DWYSUO.wiff	1130000	315000	N/A	N/A	8360000	2800000		0	149	N/A
34	D2-2		Unknown	20230912DWYSUO.wiff	2650000	874000	N/A	N/A	7960000	2440000		0	372	N/A
35	D2-3		Unknown	20230912DWYSUO.wiff	6420000	1990000	N/A	N/A	7100000	2220000		0	1020	N/A
36	D2-4		Unknown	20230912DWYSUO.wiff	9640000	2620000	N/A	N/A	7780000	2520000		0	1390	N/A
37	D2-5		Unknown	20230912DWYSUO.wiff	9720000	2830000	N/A	N/A	7480000	2440000		0	1460	N/A
38	D2-6		Unknown	20230912DWYSUO.wiff	11000000	2830000	N/A	N/A	7050000	2200000		0	1750	N/A
39	D2-7		Unknown	20230912DWYSUO.wiff	9380000	2780000	N/A	N/A	7920000	2520000		0	1330	N/A
40	D2-8		Unknown	20230912DWYSUO.wiff	10800000	3420000	N/A	N/A	7610000	2500000		0	1600	N/A
41	D2-9		Unknown	20230912DWYSUO.wiff	9970000	3020000	N/A	N/A	7730000	2280000		0	1450	N/A
42	D2-10		Unknown	20230912DWYSUO.wiff	8030000	2150000	N/A	N/A	7350000	2360000		0	1230	N/A
43	D2-11		Unknown	20230912DWYSUO.wiff	6060000	1770000	N/A	N/A	7210000	2490000		0	943	N/A
44	D2-12		Unknown	20230912DWYSUO.wiff	2170000	628000	N/A	N/A	7850000	2530000		0	308	N/A
45	D2-13		Unknown	20230912DWYSUO.wiff	992000	305000	N/A	N/A	7090000	2210000		0	155	N/A
46	D2-14		Unknown	20230912DWYSUO.wiff	498000	146000	N/A	N/A	7790000	2470000		0	69.6	N/A
47	D2-15		Unknown	20230912DWYSUO.wiff	192000	49900	N/A	N/A	7690000	2170000		0	25.7	N/A
48	D2-16		Unknown	20230912DWYSUO.wiff	1160000	318000	N/A	N/A	7330000	2140000		0	175	N/A
49	D2-17		Unknown	20230912DWYSUO.wiff	186000	50500	N/A	N/A	7400000	2360000		0	25.9	N/A
50	D2-18		Unknown	20230912DWYSUO.wiff	212000	60800	N/A	N/A	7890000	2350000		0	27.8	N/A
51	D3-1		Unknown	20230912DWYSUO.wiff	403000	111000	N/A	N/A	7530000	2210000		0	57.9	N/A
52	D3-2		Unknown	20230912DWYSUO.wiff	914000	284000	N/A	N/A	7260000	2090000		0	139	N/A
53	D3-3		Unknown	20230912DWYSUO.wiff	2360000	695000	N/A	N/A	8220000	2420000		0	321	N/A
54	D3-4		Unknown	20230912DWYSUO.wiff	3750000	1100000	N/A	N/A	7830000	2450000		0	537	N/A
55	D3-5		Unknown	20230912DWYSUO.wiff	3800000	1010000	N/A	N/A	7360000	2060000		0	579	N/A
56	D3-6		Unknown	20230912DWYSUO.wiff	4950000	1390000	N/A	N/A	7640000	2610000		0	728	N/A
57	D3-7		Unknown	20230912DWYSUO.wiff	4520000	1300000	N/A	N/A	7630000	2420000		0	665	N/A
58	D3-8		Unknown	20230912DWYSUO.wiff	5480000	1570000	N/A	N/A	7230000	2310000		0	851	N/A
59	D3-9		Unknown	20230912DWYSUO.wiff	6390000	1940000	N/A	N/A	8050000	2410000		0	891	N/A
60	D3-10		Unknown	20230912DWYSUO.wiff	6220000	1810000	N/A	N/A	7220000	2130000		0	967	N/A
61	D3-11		Unknown	20230912DWYSUO.wiff	6060000	1780000	N/A	N/A	7780000	2310000		0	874	N/A
62	D3-12		Unknown	20230912DWYSUO.wiff	3940000	1120000	N/A	N/A	7240000	2180000		0	611	N/A
63	D3-13		Unknown	20230912DWYSUO.wiff	1800000	505000	N/A	N/A	7470000	2240000		0	269	N/A
64	D3-14		Unknown	20230912DWYSUO.wiff	666000	189000	N/A	N/A	7760000	2410000		0	94.2	N/A
65	D3-15		Unknown	20230912DWYSUO.wiff	240000	68100	N/A	N/A	7680000	2420000		0	32.8	N/A
66	D3-16		Unknown	20230912DWYSUO.wiff	4160000	1170000	N/A	N/A	7320000	2090000		0	638	N/A
67	D3-17		Unknown	20230912DWYSUO.wiff	484000	139000	N/A	N/A	7270000	2140000		0	72.5	N/A
68	D3-18		Unknown	20230912DWYSUO.wiff	1320000	429000	N/A	N/A	7320000	2180000		0	200	N/A
69	D4-1		Unknown	20230912DWYSUO.wiff	1490000	409000	N/A	N/A	6970000	2300000		0	238	N/A
70	D4-2		Unknown	20230912DWYSUO.wiff	2860000	774000	N/A	N/A	7300000	1990000		0	439	N/A
71	D4-3		Unknown	20230912DWYSUO.wiff	8200000	2370000	N/A	N/A	7300000	2100000		0	1260	N/A
72	D4-4		Unknown	20230912DWYSUO.wiff	5190000	1510000	N/A	N/A	6760000	1980000		0	862	N/A
73	D4-5		Unknown	20230912DWYSUO.wiff	5090000	1350000	N/A	N/A	7840000	2410000		0	730	N/A
74	D4-6		Unknown	20230912DWYSUO.wiff	4790000	1530000	N/A	N/A	7020000	1980000		0	765	N/A
75	D4-7		Unknown	20230912DWYSUO.wiff	4550000	1110000	N/A	N/A	7500000	2160000		0	681	N/A
76	D4-8		Unknown	20230912DWYSUO.wiff	4270000	1150000	N/A	N/A	7550000	2150000		0	635	N/A
77	D4-9		Unknown	20230912DWYSUO.wiff	3230000	883000	N/A	N/A	7830000	2230000		0	462	N/A
78	D4-10		Unknown	20230912DWYSUO.wiff	2850000	729000	N/A	N/A	7600000	2080000		0	421	N/A
79	D4-11		Unknown	20230912DWYSUO.wiff	2520000	736000	N/A	N/A	7850000	2460000		0	359	N/A
80	D4-12		Unknown	20230912DWYSUO.wiff	1010000	291000	N/A	N/A	7610000	2480000		0	146	N/A
81	D4-13		Unknown	20230912DWYSUO.wiff	514000	147000	N/A	N/A	8050000	2210000		0	69.6	N/A
82	D4-14		Unknown	20230912DWYSUO.wiff	261000	74200	N/A	N/A	7150000	2080000		0	38.7	N/A
83	D4-15		Unknown	20230912DWYSUO.wiff	176000	51800	N/A	N/A	7050000	1930000		0	25.8	N/A
84	D4-16		Unknown	20230912DWYSUO.wiff	1920000	525000	N/A	N/A	7520000	2140000		0	285	N/A
85	D4-17		Unknown	20230912DWYSUO.wiff	580000	152000	N/A	N/A	7940000	2450000		0	79.9	N/A
86	D4-18		Unknown	20230912DWYSUO.wiff	569000	150000	N/A	N/A	7290000	2150000		0	85.6	N/A
87	D5-1		Unknown	20230912DWYSUO.wiff	1180000	335000	N/A	N/A	7060000	2050000		0	185	N/A
88	D5-2		Unknown	20230912DWYSUO.wiff	2300000	632000	N/A	N/A	7340000	2140000		0	351	N/A
89	D5-3		Unknown	20230912DWYSUO.wiff	4030000	1140000	N/A	N/A	7640000	2160000		0	592	N/A
90	D5-4		Unknown	20230912DWYSUO.wiff	4720000	1330000	N/A	N/A	7100000	2150000		0	747	N/A
91	D5-5		Unknown	20230912DWYSUO.wiff	6780000	1780000	N/A	N/A	7650000	2100000		0	995	N/A
92	D5-6		Unknown	20230912DWYSUO.wiff	6620000	1750000	N/A	N/A	6790000	1850000		0	1090	N/A
93	D5-7		Unknown	20230912DWYSUO.wiff	8450000	2430000	N/A	N/A	7350000	2020000		0	1290	N/A
94	D5-8		Unknown	20230912DWYSUO.wiff	7310000	1940000	N/A	N/A	7030000	2120000		0	1170	N/A
95	D5-9		Unknown	20230912DWYSUO.wiff	6960000	1790000	N/A	N/A	7420000	1970000		0	1050	N/A
96	D5-10		Unknown	20230912DWYSUO.wiff	5160000	1380000	N/A	N/A	7210000	2140000		0	803	N/A
97	D5-11		Unknown	20230912DWYSUO.wiff	4200000	1160000	N/A	N/A	7240000	2030000		0	652	N/A
98	D5-12		Unknown	20230912DWYSUO.wiff	1310000	399000	N/A	N/A	7210000	1990000		0	202	N/A
99	D5-13		Unknown	20230912DWYSUO.wiff	554000	167000	N/A	N/A	7910000	2250000		0	76.5	N/A
100	D5-14		Unknown	20230912DWYSUO.wiff	281000	80200	N/A	N/A	7650000	2400000		0	38.9	N/A
101	D5-15		Unknown	20230912DWYSUO.wiff	292000	97300	N/A	N/A	7480000	1980000		0	41.6	N/A
102	D5-16		Unknown	20230912DWYSUO.wiff	4080000	1070000	N/A	N/A	7600000	2220000		0	602	N/A
103	D5-17		Unknown	20230912DWYSUO.wiff	760000	211000	N/A	N/A	7830000	2200000		0	107	N/A
104	D5-18		Unknown	20230912DWYSUO.wiff	374000	100000	N/A	N/A	7720000	2170000		0	52.1	N/A
105	D6-1		Unknown	20230912DWYSUO.wiff	1420000	438000	N/A	N/A	7460000	2310000		0	212	N/A
106	D6-2		Unknown	20230912DWYSUO.wiff	2810000	772000	N/A	N/A	7310000	2210000		0	430	N/A
107	D6-3		Unknown	20230912DWYSUO.wiff	4180000	1230000	N/A	N/A	7360000	2190000		0	637	N/A
108	D6-4		Unknown	20230912DWYSUO.wiff	6850000	1840000	N/A	N/A	7380000	2150000		0	1040	N/A
109	D6-5		Unknown	20230912DWYSUO.wiff	2760000	705000	N/A	N/A	7560000	2200000		0	409	N/A
110	D6-6		Unknown	20230912DWYSUO.wiff	5470000	1540000	N/A	N/A	7190000	1990000		0	855	N/A
111	D6-7		Unknown	20230912DWYSUO.wiff	7360000	2020000	N/A	N/A	7480000	2120000		0	1110	N/A
112	D6-8		Unknown	20230912DWYSUO.wiff	6720000	1820000	N/A	N/A	7410000	2040000		0	1020	N/A
113	D6-9		Unknown	20230912DWYSUO.wiff	6560000	1790000	N/A	N/A	7370000	2040000		0	999	N/A
114	D6-10		Unknown	20230912DWYSUO.wiff	4030000	1130000	N/A	N/A	7240000	2150000		0	624	N/A
115	D6-11		Unknown	20230912DWYSUO.wiff	3650000	1060000	N/A	N/A	7510000	2320000		0	545	N/A
116	D6-12		Unknown	20230912DWYSUO.wiff	1200000	324000	N/A	N/A	7990000	2190000		0	166	N/A
117	D6-13		Unknown	20230912DWYSUO.wiff	482000	140000	N/A	N/A	7370000	2280000		0	71.1	N/A
118	D6-14		Unknown	20230912DWYSUO.wiff	269000	77200	N/A	N/A	7230000	2190000		0	39.4	N/A
119	D6-15		Unknown	20230912DWYSUO.wiff	258000	68400	N/A	N/A	7340000	2040000		0	37.1	N/A
120	D6-16		Unknown	20230912DWYSUO.wiff	3600000	986000	N/A	N/A	7190000	2030000		0	562	N/A
121	D6-17		Unknown	20230912DWYSUO.wiff	652000	190000	N/A	N/A	7510000	2240000		0	95.3	N/A
122	D6-18		Unknown	20230912DWYSUO.wiff	297000	81400	N/A	N/A	7590000	2190000		0	41.7	N/A
